# Supplementary material for: Removal of metformin hydrochloride by Alternanthera philoxeroides biomass derived porous carbon materials treated with hydrogen peroxide
Source: Royal Society of Chemistry journal article supplement (doi:10.1039/c6ra08365j), 2016-01-01
Supplement: c6ra08365j1.pdf [file c6ra08365j1.pdf]

**Supplementary data for:**

**Removal of metformin hydrochloride by *Alternanthera philoxeroides* biomass  
derived porous carbon materials treated with hydrogen peroxide**

Xixian Huang<sup>a,b</sup>, Yunguo Liu<sup>a,b, \*</sup>, Shaobo Liu<sup>c,d, \*</sup>, Zhongwu Li<sup>a,b</sup>, Xiaofei Tan<sup>a,b</sup>,  
Yang Ding<sup>a,b</sup>, Guangming Zeng<sup>a,b</sup>, Yan Xu<sup>a,b</sup>, Wei Zeng<sup>a,b</sup>, Bohong Zheng<sup>c</sup>

<sup>a</sup>College of Environmental Science and Engineering, Hunan University, Changsha  
410082, PR China.

<sup>b</sup>Key Laboratory of Environmental Biology and Pollution Control (Hunan University),  
Ministry of Education, Changsha 410082, PR China.

<sup>c</sup>School of Architecture and Art Central South University, Central South University,  
Changsha 410082, P. R. China.

<sup>d</sup>School of Metallurgy and Environmental, Central South University, Changsha  
410083, P.R. China

---

\* Corresponding author: Tel.: +86 731 88649208; Fax.: +86 731 88822829

E-mail: hnliuyunguo@163.com (Y.G. Liu).

\* Corresponding author: Tel.: +86 731 88830923; Fax.: +86 731 88710171

E-mail: liushaobo23@aliyun.com (S.B. Liu).

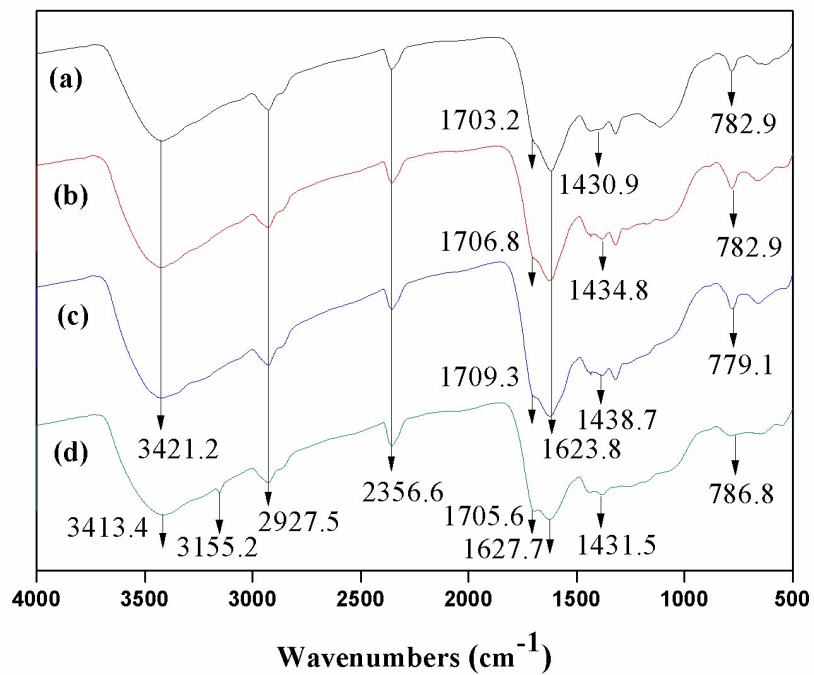

**Fig. S1.** FTIR spectra of (a) BC, (b) mBC, (c) mBC after MF adsorption, and (d) mBC after MF and Cu (II) adsorption (biochar: 300 °C).

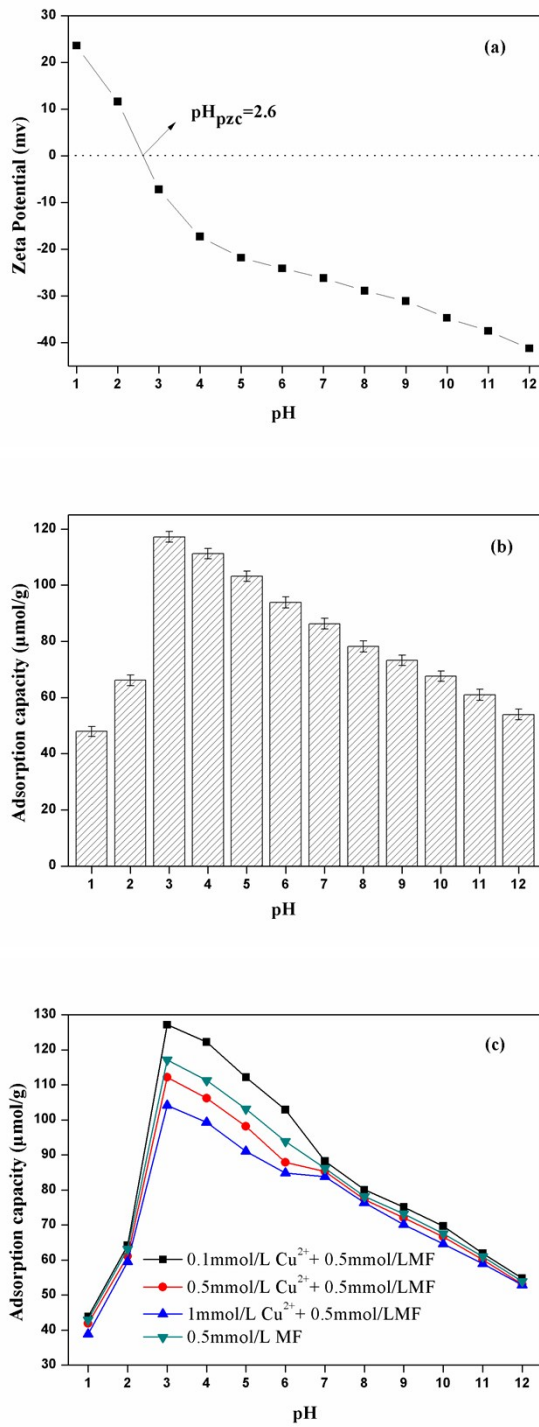

**Fig. S2.** (a) Zeta potentials of mBC, (b) MF adsorption capacity on mBC, and (c) adsorption of MF on mBC as affected by Cu (II) at different pH values (biochar: 300 °C).
